# Supplementary material for: Using AFM to probe the complexation of DNA with anionic lipids mediated by Ca2+: the role of surface pressure
Source: Royal Society of Chemistry journal article supplement (doi:10.1039/c3sm52428k), 2014-01-01
Supplement: c3sm52428k1.pdf [file c3sm52428k1.pdf]

## ELECTRONIC SUPPLEMENTARY MATERIAL (ESI) FOR SOFT MATTER

Using AFM to probe the complexation of DNA with anionic lipids mediated by Ca<sup>2+</sup>: the role of surface pressure

Germán Luque-Caballero, Alberto Martín-Molina, Alda Yadira Sánchez-Treviño, Miguel A. Rodríguez-Valverde, Miguel A. Cabrerizo-Vílchez and Julia Maldonado-Valderrama\*

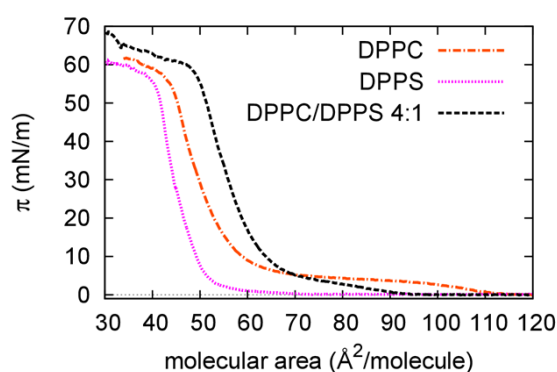

**Figure S1.**  $\pi$ -A isotherms of DPPC (orange dash-dot line), DPPS (pink dotted line) and DPPC/DPPS 4:1 (black dashed line) monolayers. Subphase: pure water. T = 20°C.

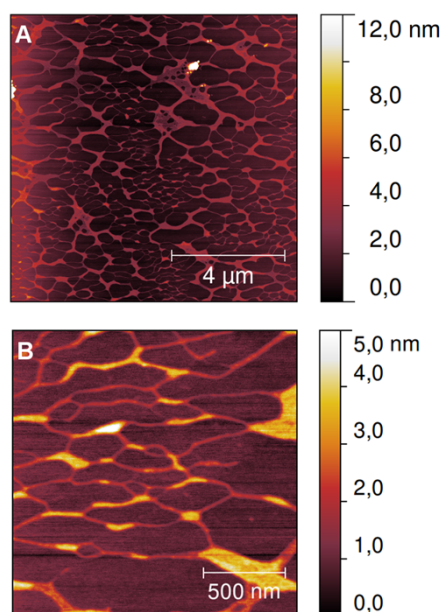

**Figure S2.** A) AFM topography image of LB transferred from an aqueous solution containing 5 mM CaCl<sub>2</sub> and 0.1 mg ml<sup>-1</sup> DNA. (B) High resolution image.
